# Supplementary material
Source: PubMed Central journal article supplement (PMC8279092)
Supplement: NEJMoa2107715_disclosures.pdf [file NEJMoa2107715_disclosures.pdf]

**Disclosure Purpose:** 21-07715

### Summary of Interests

I do not have any interests to disclose at this time.

### Additional Questions:

- Are there other relationships or activities that readers could perceive to have influenced, or that give the appearance of potentially influencing, what you wrote in the submitted work?**  
No.
- What is the manuscript title?**  
Effectiveness of an Inactivated SARS-CoV-2 Vaccine
- Are you the corresponding author?**  
No.

### Certification

I certify that the information provided in this disclosure is complete and accurate.

Disclosure Purpose: 21-07715

## Summary of Interests

### Company or Organization

| Entity                                                                                                                                                                                                                                                                                          | Type             | Interest Held By |
|-------------------------------------------------------------------------------------------------------------------------------------------------------------------------------------------------------------------------------------------------------------------------------------------------|------------------|------------------|
| <b>Agencia Nacional de Investigación y Desarrollo (ANID)</b>                                                                                                                                                                                                                                    | Grant / Contract | Self             |
| <i>Recipient Name:</i> Rafael Araos<br><i>Grant / Contract Description:</i> Millennium Initiative for Collaborative Research in Bacterial Resistance (MICROB-R) (NCN17_081)<br><i>Recipient Type:</i> Individual<br><i>Grant / Contract Purpose:</i> Research<br><i>Additional Information:</i> |                  |                  |
| <b>ANID Fondo de Financiamiento de Centros de Investigación en Áreas Prioritarias (FONDAP) (15130011)</b>                                                                                                                                                                                       | Grant / Contract | Self             |
| <i>Recipient Name:</i> Rafael Araos<br><i>Grant / Contract Description:</i> Advanced Center for Chronic Diseases<br><i>Additional Information:</i><br><i>Recipient Type:</i> Individual<br><i>Grant / Contract Purpose:</i> Research                                                            |                  |                  |
| <b>Ministry of Health</b>                                                                                                                                                                                                                                                                       | Consultant       | Self             |
| <i>Category:</i> Consultant<br><i>Additional Information:</i><br><i>Description:</i> Scientific advisor                                                                                                                                                                                         |                  |                  |

## Additional Questions:

- Are there other relationships or activities that readers could perceive to have influenced, or that give the appearance of potentially influencing, what you wrote in the submitted work?**  
No.
- What is the manuscript title?**  
Effectiveness of an Inactivated SARS-CoV-2 Vaccine
- Are you the corresponding author?**  
Yes.
  - Please list the other authors' names here.**  
Alejandro Jara, Eduardo A. Undurraga, Cecilia González, Fabio Paredes, Tomás Fontecilla, Gonzalo Jara, Alejandra Pizarro, Johanna Acevedo, Katherine Leo, Francisco Leon, Carlos Sans, Paulina Leighton, Pamela Suárez, Heriberto García-Escorza

## Certification

I certify that the information provided in this disclosure is complete and accurate.

**Disclosure Purpose:** 21-07715

### Summary of Interests

I do not have any interests to disclose at this time.

### Additional Questions:

- Are there other relationships or activities that readers could perceive to have influenced, or that give the appearance of potentially influencing, what you wrote in the submitted work?**  
No.
- What is the manuscript title?**  
Effectiveness of an Inactivated SARS-CoV-2 Vaccine
- Are you the corresponding author?**  
No.

### Certification

I certify that the information provided in this disclosure is complete and accurate.

**Disclosure Purpose:** 21-07715

### Summary of Interests

I do not have any interests to disclose at this time.

### Additional Questions:

1. **Are there other relationships or activities that readers could perceive to have influenced, or that give the appearance of potentially influencing, what you wrote in the submitted work?**  
Yes.
  - a. **Please describe those relationships.**  
Public Health Institute Director
2. **What is the manuscript title?**  
Effectiveness of an inactivated SARS-CoV-2 vaccine
3. **Are you the corresponding author?**  
No.

### Certification

I certify that the information provided in this disclosure is complete and accurate.

**Disclosure Purpose:** 21-07715

**Summary of Interests**

I do not have any interests to disclose at this time.

**Additional Questions:**

- 1. **Are there other relationships or activities that readers could perceive to have influenced, or that give the appearance of potentially influencing, what you wrote in the submitted work?**  
No.
- 2. **What is the manuscript title?**  
Effectiveness of an Inactivated SARS-CoV-2 Vaccine
- 3. **Are you the corresponding author?**  
No.

**Certification**

I certify that the information provided in this disclosure is complete and accurate.

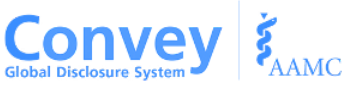

**Disclosure Purpose:** 21-07715

## Summary of Interests

| Entity                                                                                                                                                                  | Type             | Interest Held By                                                                              |
|-------------------------------------------------------------------------------------------------------------------------------------------------------------------------|------------------|-----------------------------------------------------------------------------------------------|
| <a href="#">Agencia Nacional de Investigación y Desarrollo (ANID)</a>                                                                                                   | Grant / Contract | Self                                                                                          |
| <i>Recipient Name:</i> Alejandro Jara<br><i>Grant / Contract Description:</i> Millennium Science Initiative Program MIDAS [NCN17_059]<br><i>Additional Information:</i> |                  | <i>Recipient Type:</i> Individual<br><i>Grant / Contract Purpose:</i> Research                |
| <a href="#">Ministry of Health</a>                                                                                                                                      | Consultant       | Self                                                                                          |
| <i>Category:</i> Consultant<br><i>Additional Information:</i>                                                                                                           |                  | <i>Description:</i> Statistics and Data Science Consultant of the Chilean Ministry of Health. |

## Additional Questions:

- Are there other relationships or activities that readers could perceive to have influenced, or that give the appearance of potentially influencing, what you wrote in the submitted work?**  
No.
- What is the manuscript title?**  
Effectiveness of an Inactivated SARS-CoV-2 Vaccine
- Are you the corresponding author?**  
No.

## Certification

I certify that the information provided in this disclosure is complete and accurate.

Disclosure Purpose: 21-07715

Summary of Interests

**Company or Organization**

| Entity                                                                                 | Type       | Interest Held By                                                    |
|----------------------------------------------------------------------------------------|------------|---------------------------------------------------------------------|
| Ministry of Health                                                                     | Employment | Self                                                                |
| <i>Title:</i> Employee at Chile's Ministry of Health<br><i>Additional Information:</i> |            | <i>Position Description:</i> Data Analyst and Engineering processes |

Additional Questions:

- Are there other relationships or activities that readers could perceive to have influenced, or that give the appearance of potentially influencing, what you wrote in the submitted work?**  
No.
- What is the manuscript title?**  
Effectiveness of an Inactivated SARS-CoV-2 Vaccine
- Are you the corresponding author?**  
No.

Certification

I certify that the information provided in this disclosure is complete and accurate.

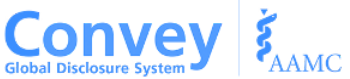

**Disclosure Purpose:** 21-07715

## Summary of Interests

| Company or Organization                                                               |            |                                                                                     |
|---------------------------------------------------------------------------------------|------------|-------------------------------------------------------------------------------------|
| Entity                                                                                | Type       | Interest Held By                                                                    |
| <a href="#">Ministerio de Salud de la Nación</a>                                      | Consultant | Self                                                                                |
| <i>Category:</i> Consultant<br><i>Additional Information:</i> Profesional grado 5 EUS |            | <i>Description:</i> Profesional Departamento de Estadísticas e Información de Salud |

## Additional Questions:

- Are there other relationships or activities that readers could perceive to have influenced, or that give the appearance of potentially influencing, what you wrote in the submitted work?**  
No.
- What is the manuscript title?**  
Effectiveness of an Inactivated SARS-CoV-2 Vaccine
- Are you the corresponding author?**  
No.

## Certification

I certify that the information provided in this disclosure is complete and accurate.



**Disclosure Purpose:** 21-07715

## Summary of Interests

| Company or Organization                                                         |            |                                                                   |
|---------------------------------------------------------------------------------|------------|-------------------------------------------------------------------|
| Entity                                                                          | Type       | Interest Held By                                                  |
| Ministry of Health                                                              | Employment | Self                                                              |
| <i>Title:</i> Head of Management and Planning<br><i>Additional Information:</i> |            | <i>Position Description:</i> Data analysis and processes planning |

## Additional Questions:

- Are there other relationships or activities that readers could perceive to have influenced, or that give the appearance of potentially influencing, what you wrote in the submitted work?**  
No.
- What is the manuscript title?**  
Effectiveness of an Inactivated SARS-CoV-2 Vaccine
- Are you the corresponding author?**  
No.

## Certification

I certify that the information provided in this disclosure is complete and accurate.

**Disclosure Purpose:** 21-07715

**Summary of Interests**

I do not have any interests to disclose at this time.

**Additional Questions:**

- 1. **Are there other relationships or activities that readers could perceive to have influenced, or that give the appearance of potentially influencing, what you wrote in the submitted work?**  
No.
- 2. **What is the manuscript title?**  
Effectiveness of an Inactivated SARS-CoV-2 Vaccine
- 3. **Are you the corresponding author?**  
No.

**Certification**

I certify that the information provided in this disclosure is complete and accurate.



**Disclosure Purpose:** 21-07715

### Summary of Interests

I do not have any interests to disclose at this time.

### Additional Questions:

- Are there other relationships or activities that readers could perceive to have influenced, or that give the appearance of potentially influencing, what you wrote in the submitted work?**  
No.
- What is the manuscript title?**  
Effectiveness of an Inactivated SARS-CoV-2 Vaccine
- Are you the corresponding author?**  
No.

### Certification

I certify that the information provided in this disclosure is complete and accurate.

**Disclosure Purpose:** 21-07715

## Summary of Interests

| Company or Organization                                                                                                                |            |                              |
|----------------------------------------------------------------------------------------------------------------------------------------|------------|------------------------------|
| Entity                                                                                                                                 | Type       | Interest Held By             |
| <a href="#">Pontificia Universidad Católica de Chile</a>                                                                               | Employment | Self                         |
| <i>Title:</i> Profesor Departamento de enfermedades infecciosas del adulto<br><i>Additional Information:</i> I am on leave without pay |            | <i>Position Description:</i> |

## Additional Questions:

- Are there other relationships or activities that readers could perceive to have influenced, or that give the appearance of potentially influencing, what you wrote in the submitted work?**  
No.
- What is the manuscript title?**  
Effectiveness of an inactivated SARS-CoV2 vaccine in Chile
- Are you the corresponding author?**  
No.

## Certification

I certify that the information provided in this disclosure is complete and accurate.

**Disclosure Purpose:** 21-07715

**Summary of Interests**

I do not have any interests to disclose at this time.

**Additional Questions:**

1. **Are there other relationships or activities that readers could perceive to have influenced, or that give the appearance of potentially influencing, what you wrote in the submitted work?**

Yes.

a. **Please describe those relationships.**

I work as head of the statistics department in the Ministry of Health of Chile

2. **What is the manuscript title?**

Effectiveness of an Inactivated SARS-CoV-2 Vaccine

3. **Are you the corresponding author?**

No.

**Certification**

I certify that the information provided in this disclosure is complete and accurate.

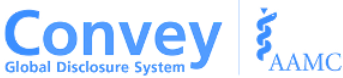

Disclosure Purpose: 21-07715

Summary of Interests

**Company or Organization**

| Entity                                              | Type       | Interest Held By                                                                                                                   |
|-----------------------------------------------------|------------|------------------------------------------------------------------------------------------------------------------------------------|
| <a href="#">Ministerio de Salud de la Nación</a>    | Employment | Self                                                                                                                               |
| <i>Title:</i> Ingeniero de Ejecución en Informática |            | <i>Position Description:</i> Encargada de la Oficina de Análisis en el Departamento de Estadísticas e Información en Salud - Chile |
| <i>Additional Information:</i>                      |            |                                                                                                                                    |

Additional Questions:

- Are there other relationships or activities that readers could perceive to have influenced, or that give the appearance of potentially influencing, what you wrote in the submitted work?**  
No.
- What is the manuscript title?**  
Efectividad de una vacuna inactivada contra el SARS-CoV-2
- Are you the corresponding author?**  
No.

Certification

I certify that the information provided in this disclosure is complete and accurate.

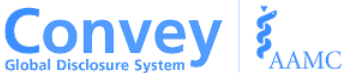

**Disclosure Purpose:** 21-07715

## Summary of Interests

| Company or Organization                                                                                                                                                                  |                  |                                                                                                                  |
|------------------------------------------------------------------------------------------------------------------------------------------------------------------------------------------|------------------|------------------------------------------------------------------------------------------------------------------|
| Entity                                                                                                                                                                                   | Type             | Interest Held By                                                                                                 |
| Agencia Nacional de Investigacion y Desarrollo                                                                                                                                           | Grant / Contract | Self                                                                                                             |
| <i>Recipient Name:</i> Eduardo A Undurraga<br><i>Grant / Contract Description:</i> Research Center for Integrated Disaster Risk Management, ANID FONDAP 15110017                         |                  | <i>Recipient Type:</i> Individual<br><i>Grant / Contract Purpose:</i> Research<br><i>Additional Information:</i> |
| Agencia Nacional de Investigación y Desarrollo                                                                                                                                           | Grant / Contract | Self                                                                                                             |
| <i>Recipient Name:</i> Eduardo A Undurraga<br><i>Grant / Contract Description:</i> Collaborative Research in Bacterial Resistance, MICROB-R, NCN17_081<br><i>Additional Information:</i> |                  | <i>Recipient Type:</i> Individual<br><i>Grant / Contract Purpose:</i> Research                                   |

## Additional Questions:

- Are there other relationships or activities that readers could perceive to have influenced, or that give the appearance of potentially influencing, what you wrote in the submitted work?**  
No.
- What is the manuscript title?**  
Effectiveness of an inactivated SARS-CoV-2 vaccine in Chile
- Are you the corresponding author?**  
No.

## Certification

I certify that the information provided in this disclosure is complete and accurate.
